# Supplementary material
Source: PubMed Central journal article supplement (PMC3370124)
Supplement: NIHMS368893-supplement-Supp_Table_S1___Fig_S1-S2.pdf [file NIHMS368893-supplement-Supp_Table_S1___Fig_S1-S2.pdf]

## Supplemental material for

### Multi-LZerD: Multiple protein docking for asymmetric complexes

By Juan Esquivel-Rodríguez, Yifeng David Yang, and Daisuke Kihara

Contact: [dkihara@purdue.edu](mailto:dkihara@purdue.edu)

**Table SI.** The number of decoys in the final population with a correctly predicted subcomplex.

| <b>A. Bound cases</b> |                                                                           |     |   |   |     |     |
|-----------------------|---------------------------------------------------------------------------|-----|---|---|-----|-----|
| PDB ID <sup>a)</sup>  | Number of Subunits in the correctly predicted sub-complexes <sup>b)</sup> |     |   |   |     |     |
|                       | 6                                                                         | 5   | 4 | 3 | 2   | 0   |
| 2AZE (3)              | -                                                                         | -   | - | 1 | 29  | 0   |
| 1A0R (3)              | -                                                                         | -   | - | 1 | 121 | 0   |
| 1VCB (3)              | -                                                                         | -   | - | 1 | 40  | 112 |
| 1K6N (3)              | -                                                                         | -   | - | 1 | 198 | 0   |
| 1B9X (3)              | -                                                                         | -   | - | 1 | 198 | 0   |
| 6RLX (4)              | -                                                                         | -   | 0 | 1 | 131 | 68  |
| 1QGW (4)              | -                                                                         | -   | 1 | 0 | 198 | 0   |
| 1LOG (4)              | -                                                                         | -   | 1 | 0 | 111 | 0   |
| 1NNU (4)              | -                                                                         | -   | 1 | 1 | 138 | 0   |
| 1RHM (4)              | -                                                                         | -   | 1 | 1 | 82  | 0   |
| 1I3O (6)              | 5                                                                         | 190 | 4 | 0 | 0   | 0   |

The analysis was performed on the bound multiple docking prediction results shown in Table 2.

- The number of chains in the complex is shown in parentheses.
- In each decoy structure, the maximum number of subunits which are assembled within a global RMSD of 4.0 Å is counted.

| <b>B. Unbound Cases</b> |                                                                           |   |   |   |     |     |
|-------------------------|---------------------------------------------------------------------------|---|---|---|-----|-----|
| PDB ID <sup>a)</sup>    | Number of Subunits in the correctly predicted sub-complexes <sup>b)</sup> |   |   |   |     |     |
|                         | 6                                                                         | 5 | 4 | 3 | 2   | 0   |
| 1A0Rbg (3)              | -                                                                         | - | - | 0 | 19  | 180 |
| 1A0Rb (3)               | -                                                                         | - | - | 1 | 168 | 30  |
| 1A0Rg (3)               | -                                                                         | - | - | 1 | 141 | 57  |
| 1VCBabc (3)             | -                                                                         | - | - | 1 | 180 | 18  |
| 1QGWabcd (3)            |                                                                           | - | 1 | 7 | 191 | 0   |
| 1NNUabcd (4)            | -                                                                         | - | 1 | 3 | 195 | 0   |
| 1NNUab (4)              | -                                                                         | - | 1 | 1 | 193 | 4   |
| 1NNUcd (4)              | -                                                                         | - | 1 | 3 | 111 | 84  |
| 1LOGabcd (4)            | -                                                                         | - | 1 | 1 | 197 | 0   |
| 1RHMabcd (4)            | -                                                                         | - | 1 | 0 | 39  | 159 |

The analysis was performed on the unbound multiple docking prediction results shown in Table 3.

**Figure S1.** RMSD and physics-based scores in final GA generation.

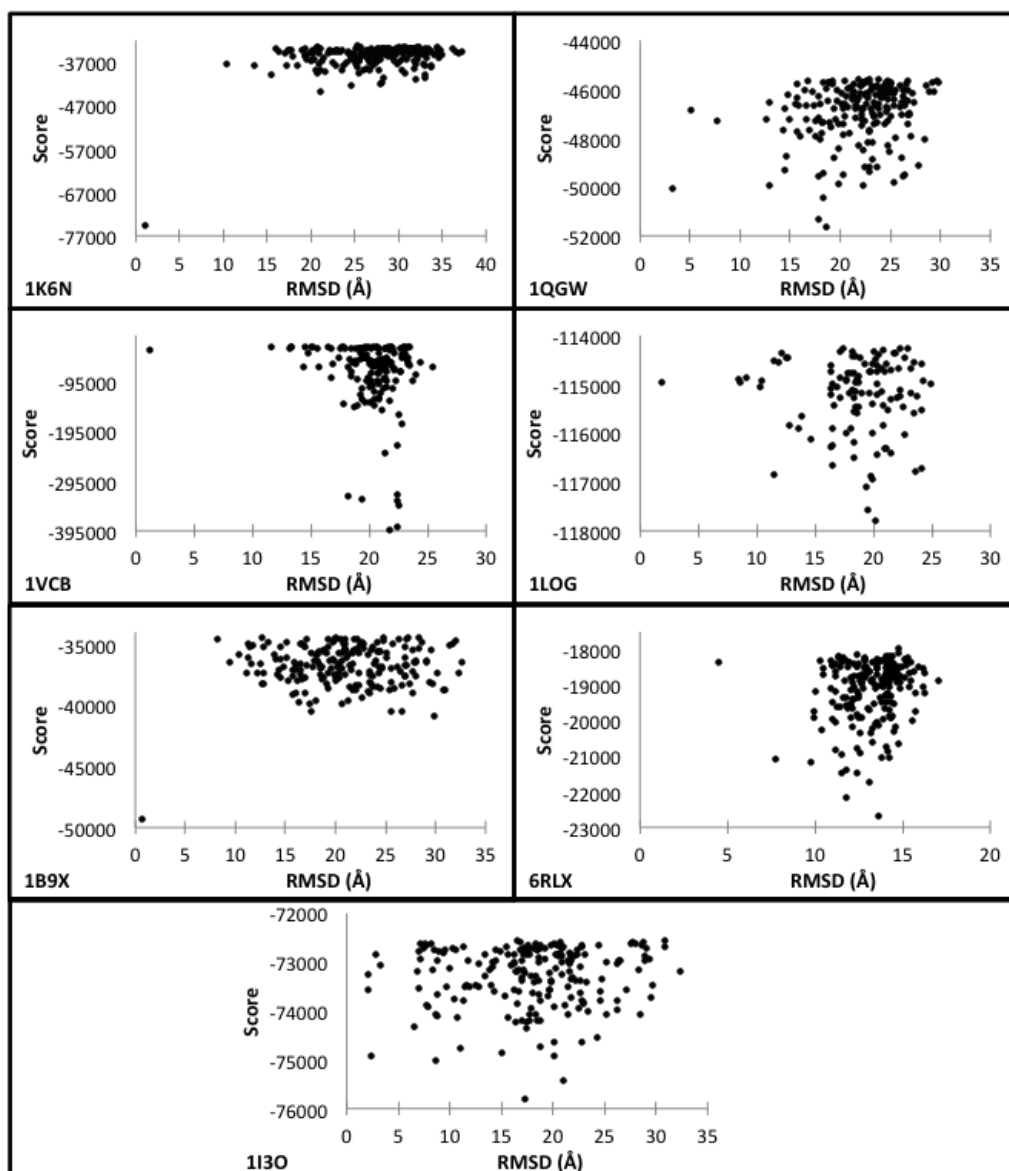

Plots for the other four protein complexes in the dataset (Table 1) are shown as Figure 3 in the main text.

**Figure S2.** The evolution of the fitness score and the RMSD.

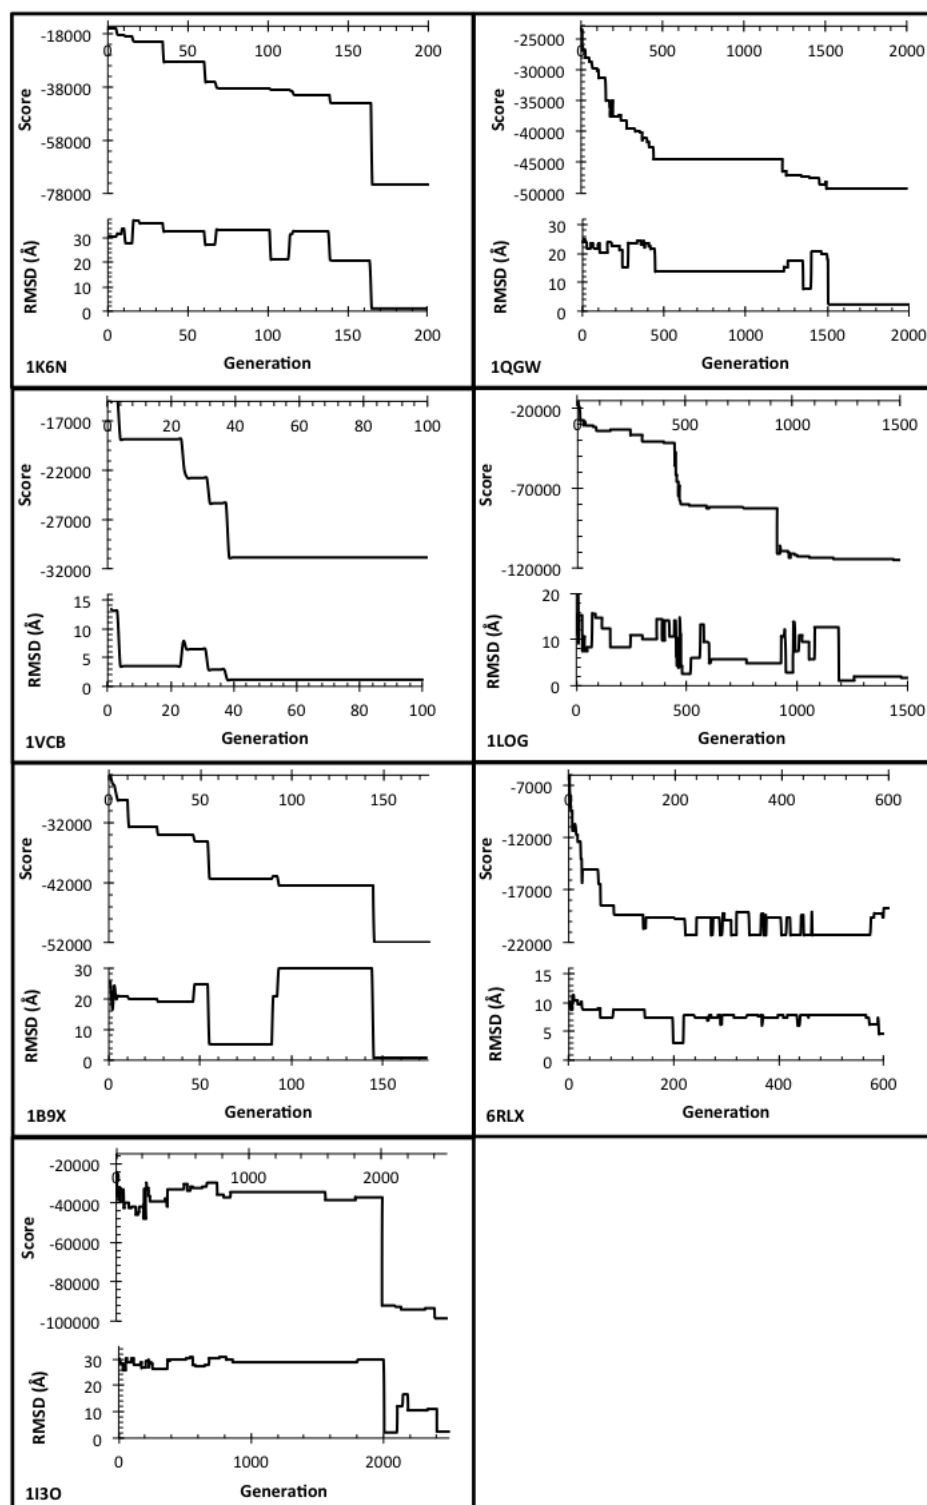

Plots for the other four protein complexes in the dataset (Table 1) are shown as Figure 4 in the main text.
